# Supplementary material for: Trends in Open vs. Endoscopic Carpal Tunnel Release: A Comprehensive Survey in Japan
Source: MDPI journal article supplement (doi:10.3390/jcm11174966), 2022-08-24
Supplement: s1 [file s1]

**Table S1.** Prefectural data.

| <b>Prefecture</b> | <b>Hand surgery specialists</b> | <b>Prefectural residents (thousands)</b> | <b>Hand surgery specialists per 100,000 residents</b> | <b>OCTR SIR (95% CI)</b> | <b>ECTR SIR (95% CI)</b> |
|-------------------|---------------------------------|------------------------------------------|-------------------------------------------------------|--------------------------|--------------------------|
| Hokkaido          | 58                              | 5250                                     | 1.11                                                  | 1.55 (1.51–1.6)          | 0.66 (0.41–0.91)         |
| Aomori            | 10                              | 1246                                     | 0.8                                                   | 1.22 (0.99–1.44)         | 3.40 (3.02–3.78)         |
| Iwate             | 8                               | 1227                                     | 0.65                                                  | 0.99 (0.82–1.17)         | 0.26 (0.01–0.51)         |
| Miyagi            | 9                               | 2306                                     | 0.39                                                  | 0.68 (0.58–0.78)         | 1.00 (0.35–1.66)         |
| Akita             | 2                               | 966                                      | 0.21                                                  | 1.56 (1.47–1.66)         | 0.05 (0.0–0.14)          |
| Yamagata          | 14                              | 1078                                     | 1.3                                                   | 1.28 (1.22–1.34)         | 0.70 (0.35–1.04)         |
| Fukushima         | 12                              | 1846                                     | 0.65                                                  | 1.54 (1.39–1.69)         | 0.28 (0.16–0.39)         |
| Ibaragi           | 12                              | 2860                                     | 0.42                                                  | 0.78 (0.68–0.89)         | 0.29 (0.20–0.37)         |
| Tochigi           | 15                              | 1934                                     | 0.78                                                  | 0.8 (0.72–0.87)          | 1.12 (0.86–1.38)         |
| Gunma             | 17                              | 1942                                     | 0.88                                                  | 1.12 (1.01–1.24)         | 0                        |
| Saitama           | 33                              | 7350                                     | 0.45                                                  | 0.39 (0.32–0.46)         | 0.36 (0.27–0.44)         |
| Chiba             | 42                              | 6259                                     | 0.67                                                  | 0.67 (0.59–0.75)         | 0.40 (0.28–0.52)         |
| Tokyo             | 150                             | 13921                                    | 1.08                                                  | 0.5 (0.43–0.58)          | 0.73 (0.63–0.83)         |
| Kanagawa          | 57                              | 9198                                     | 0.62                                                  | 0.58 (0.53–0.63)         | 0.63 (0.51–0.75)         |
| Niigata           | 30                              | 2223                                     | 1.35                                                  | 1.23 (1.14–1.32)         | 1.78 (0.68–2.88)         |
| Toyama            | 5                               | 1044                                     | 0.48                                                  | 1.57 (1.39–1.76)         | 0.71 (0.24–1.18)         |
| Ishikawa          | 9                               | 1138                                     | 0.79                                                  | 1.18 (1–1.37)            | 0.13 (0.0–0.32)          |
| Fukui             | 5                               | 768                                      | 0.65                                                  | 1.21 (1.09–1.34)         | 2.16 (1.51–2.81)         |
| Yamanashi         | 7                               | 811                                      | 0.86                                                  | 1.14 (1.06–1.22)         | 0                        |
| Nagano            | 22                              | 2049                                     | 1.07                                                  | 1.73 (1.63–1.83)         | 2.63 (2.38–2.89)         |
| Gifu              | 10                              | 1987                                     | 0.5                                                   | 0.65 (0.61–0.7)          | 0.97 (0.58–1.36)         |
| Shizuoka          | 21                              | 3644                                     | 0.58                                                  | 1.05 (0.98–1.13)         | 0.81 (0.74–0.88)         |
| Aichi             | 62                              | 7552                                     | 0.82                                                  | 0.36 (0.33–0.39)         | 1.28 (0.96–1.59)         |
| Mie               | 10                              | 1781                                     | 0.56                                                  | 0.93 (0.89–0.97)         | 0.72 (0.32–1.12)         |
| Shiga             | 7                               | 1414                                     | 0.5                                                   | 0.86 (0.78–0.93)         | 0.25 (0.04–0.46)         |
| Kyoto             | 27                              | 2583                                     | 1.05                                                  | 0.78 (0.68–0.89)         | 1.41 (1.20–1.63)         |
| Osaka             | 92                              | 8809                                     | 1.04                                                  | 0.76 (0.67–0.85)         | 0.48 (0.30–0.66)         |
| Hyogo             | 38                              | 5466                                     | 0.7                                                   | 0.82 (0.75–0.89)         | 1.28 (0.94–1.63)         |
| Nara              | 16                              | 1330                                     | 1.2                                                   | 1.05 (1.01–1.09)         | 2.04 (1.58–2.50)         |
| Wakayama          | 11                              | 925                                      | 1.19                                                  | 1.33 (1.17–1.5)          | 0.33 (0.15–0.51)         |

|           |    |      |      |                  |                  |
|-----------|----|------|------|------------------|------------------|
| Tottori   | 2  | 556  | 0.36 | 1.68 (1.44–1.92) | 0.79 (0.09–1.48) |
| Shimane   | 5  | 674  | 0.74 | 1.94 (1.75–2.14) | 0                |
| Okayama   | 22 | 1890 | 1.16 | 0.9 (0.84–0.97)  | 3.45 (1.99–4.90) |
| Hiroshima | 26 | 2804 | 0.93 | 1.3 (1.25–1.35)  | 0.58 (0.45–0.71) |
| Yamaguchi | 17 | 1358 | 1.25 | 1.55 (1.48–1.62) | 1.70 (1.49–1.91) |
| Tokushima | 4  | 728  | 0.55 | 1.17 (0.99–1.34) | 0                |
| Kagawa    | 12 | 956  | 1.26 | 1.41 (1.33–1.49) | 1.02 (0.93–1.22) |
| Ehime     | 6  | 1339 | 0.45 | 1.52 (1.44–1.6)  | 0.76 (0.25–1.27) |
| Kochi     | 7  | 698  | 1    | 1.25 (1.1–1.41)  | 4.45 (3.79–5.11) |
| Fukuoka   | 48 | 5104 | 0.94 | 1.07 (0.96–1.19) | 1.39 (1.00–1.78) |
| Saga      | 9  | 815  | 1.1  | 1.1 (0.91–1.3)   | 3.92 (2.72–5.12) |
| Nagasaki  | 9  | 1327 | 0.68 | 0.86 (0.8–0.92)  | 0.24 (0.06–0.41) |
| Kumamoto  | 10 | 1748 | 0.57 | 2.22 (2.1–2.34)  | 3.08 (2.23–3.92) |
| Oita      | 11 | 1135 | 0.97 | 1.83 (1.63–2.03) | 2.07 (0.96–3.17) |
| Miyazaki  | 4  | 1073 | 0.37 | 1.28 (1.14–1.41) | 1.93 (1.67–2.19) |
| Kagoshima | 5  | 1602 | 0.31 | 1.16 (1.02–1.3)  | 1.26 (1.16–1.37) |
| Okinawa   | 11 | 1453 | 0.76 | 0.86 (0.77–0.95) | 0.03 (0.0–0.11)  |

OCTR: open carpal tunnel release; ECTR: endoscopic carpal tunnel release; SIR: standardized incidence ratio; CI: confidence interval
